# Supplementary material for: Correction: The Intraocular Pressure under Deep versus Moderate Neuromuscular Blockade during Low-Pressure Robot Assisted Laparoscopic Radical Prostatectomy in a Randomized Trial
Source: PLoS One. 2018 Oct 18;13(10):e0206339. doi: 10.1371/journal.pone.0206339 (PMC6193715; doi:10.1371/journal.pone.0206339)
Supplement: S1 Dataset — (XLSX) [file pone.0206339.s001.xlsx]

## Sheet: Sheet1
Sequence	Group	Age	Height	Weight	BMI	Anes_time	op_time	pneumo_time	tren_time	Total CO2 amounts	Total ephedrine_amounts	Totalfluid	Total blood loss	Total UO	Total relaxant agents amounts	TOF/PTC	ASA	HTN	DM	ASTHMA	Total reverse amounts	Time in PACU	SPo2	RR	Worst_surgical_condition	overall	Nausea	Dry mouth	VNRS in PACU	IOP_T0	IOP_T1	IOP_T2	IOP_T3	IOP_T4	IOP_T5	IOP_T6	IOP_T7	IOP_T8	MBP_T0	MBP_T1	MBP_T2	MBP_T3	MBP_T4	MBP_T5	MBP_T6	MBP_T7	MBP_T8	ETCO2_T1	ETCO2_T2
1	2	62	172	71	24	205	160	118	108	990	8	2300	750	100	285.6	1.63	1	0	0	0	300	60	100	17	3	4	0	3	5	13	10	17	21	22	18	17	15	13	87.15	85.15	85.85	69.21	77.52	65.17	77.85	88.47	84.8	35	34
2	2	61	164	62	23.05	220	180	126	122	990	0	1650	500	100	321.8	1.25	1	0	0	0	240	70	100	14	3	4	0	1	2	15	8	13	19	20	15	17	15	16	91.26	96.14	69.27	86.53	83.52	67.21	103.54	109.15	110.14	34	34
3	2	64	170	60	20.95	130	95	68	62	660	0	1000	400	400	190.1	1.38	2	1	0	0	240	60	100	13	2	4	0	3	4	16	9	18	22	23	17	18	16	16	89.07	68.88	89.86	76.55	79.56	65.21	97.23	84.55	94.23	32	37
4	1	62	171	73	24.96	150	133	96	79	554	0	900	200	100	67.7	2	2	1	1	0	1	60	100	16	2	2	0	0	1	18	11	14	23	25	17	19	17	16	100.31	84.17	77.22	73.87	74.54	70.57	99.8	85.18	82.16	34	34
5	1	57	167	62	22.23	130	95	66	61	468	0	900	250	200	52	1.88	1	0	0	0	1	60	99	14	4	5	0	1	3	14	8	13	19	20	16	17	15	14	106.25	77.87	111.48	92.2	82.22	68.89	113.47	92.47	91.18	37	39
6	2	66	168	64	22.68	150	110	81	74	293	0	1200	800	100	216	2.38	1	0	0	0	240	60	97	15	4	4	0	2	2	13	8	12	18	19	14	15	16	15	90.75	91.5	108.15	91.51	99.49	83.49	98.46	103.43	104.79	38	43
7	2	63	169	63	22.06	140	100	67	60	264	0	1250	200	200	207.9	3	2	1	1	0	120	60	99	19	3	4	0	1	3	15	11	18	20	19	16	17	15	14	108.51	94.19	90.5	74.54	81.86	68.2	101.76	96.45	107.47	35	40
8	1	69	164	70	25.88	195	160	118	101	533	0	900	400	200	102.3	1.5	2	1	0	0	1	60	100	14	2	2	0	1	2	15	12	16	25	26	18	19	15	16	105.58	73.85	76.53	82.85	69.55	70.19	103.1	84.13	86.17	33	36
9	2	65	163	60	22.58	160	125	97	76	177	4	1900	400	250	232.2	2.13	2	0	0	0	120	60	100	15	4	4	0	1	2	13	10	16	19	20	15	16	13	14	89.92	59.85	73.87	71.55	66.55	69.18	83.1	81.48	89.12	33	35
10	2	54	179	76	23.72	165	120	93	84	230	0	1000	400	200	233.8	3.13	2	1	0	0	160	60	100	18	4	5	0	0	2	16	11	17	20	21	17	17	16	15	100.68	80.51	99.8	85.19	73.2	74.85	109.85	89.47	89.8	38	37
11	2	65	166.3	83.1	30.05	130	95	69	61	176	0	1000	100	200	186.9	1.25	2	1	0	0	160	60	100	13	4	5	0	1	3	17	9	15	21	22	17	18	17	17	102.9	71.52	87.52	101.51	83.86	79.17	102.48	103.8	113.14	38	36
12	1	68	176	90	29.05	140	90	72	64	230	0	800	300	200	61	1.88	2	1	0	0	1	60	100	13	3	3	0	1	3	15	10	18	20	21	17	18	16	15	97.49	93.76	67.85	68.2	86.15	75.8	98.46	97.43	85.75	35	33
13	2	71	159	60	23.85	135	90	71	65	235	4	900	100	100	171	2.13	1	0	0	0	120	60	100	14	5	5	0	1	3	16	9	15	20	19	14	13	14	13	88.28	72.53	93.1	77.22	69.85	68.53	96.4	102.13	94.51	37	37
14	1	64	159	60	23.89	120	85	66	61	260	0	700	400	200	48.6	1.5	1	0	0	0	1	90	100	17	3	3	0	3	6	12	10	18	25	26	16	17	15	13	75.23	75.51	100.79	86.18	72.22	71.52	116.4	96.04	82.79	33	35
15	2	58	169.3	62.9	21.95	155	100	73	63	177	8	1300	400	200	208.2	1.38	1	0	0	0	120	60	100	15	4	4	0	0	2	14	9	18	20	19	16	15	15	14	80.59	61.51	90.83	79.16	76.84	66.5	81.14	92.14	81.5	37	38
16	2	58	170	62.7	21.52	225	160	136	116	534	8	1400	500	100	297.5	2.75	2	1	0	0	120	60	100	19	4	4	0	1	2	15	10	21	20	19	16	16	15	14	100.52	64.85	90.15	64.53	76.19	66.5	96.46	109.45	115.75	38	41
17	2	66	173	69	23.05	155	105	82	75	205	0	1050	300	400	194.4	1.75	1	0	0	0	140	60	100	14	5	5	0	2	2	17	11	17	19	20	16	17	16	15	88.9	83.14	109.8	93.5	84.18	69.85	86.45	90.08	93.78	33	33
18	1	58	162	63	24.04	180	130	106	96	999	0	1800	1000	250	88.5	1.38	2	0	0	0	1	60	100	14	3	3	0	2	3	17	11	15	26	28	19	20	18	17	103.61	69.5	100.12	80.87	88.51	95.15	99.7	109.49	106.08	35	39
19	2	61	165	73	26.95	185	120	90	80	479	0	1300	100	200	232.2	2.13	2	1	1	0	140	70	99	12	5	5	0	2	3	14	7	18	18	20	15	16	14	13	98.35	73.2	65.21	79.89	78.89	72.88	93.87	108.48	100.82	32	32
20	1	57	166	64	23.14	150	100	75	61	625	0	1200	500	100	54.6	1.63	1	0	0	0	1	70	100	10	3	4	1	3	6	15	10	18	26	23	20	14	17	16	91.56	82.18	95.17	85.21	74.22	70.2	109.87	70.49	72.88	36	37
21	2	56	167	62	22.25	130	95	69	61	226	4	1100	50	250	154	1.13	2	0	0	0	120	60	100	13	5	5	0	2	3	18	10	12	19	20	16	18	17	17	86.25	63.2	87.18	75.85	70.19	63.86	80.52	78.37	75.05	32	35
22	2	65	168	62	21.97	150	100	71	64	301	0	900	300	400	174.9	1.5	1	0	0	0	120	60	100	13	4	5	0	1	2	15	9	17	21	20	16	17	15	16	103.38	90.81	70.83	83.2	80.53	73.84	103.1	97.38	98	32	33
23	1	55	167	66	23.76	280	230	170	110	808	4	2000	700	300	146.4	1.63	2	0	0	0	1	60	100	17	3	4	0	1	3	16	11	14	24	27	19	17	15	16	102.99	79.9	105.42	85.14	67.2	70.49	106.4	84.77	81.44	34	35
24	1	66	169	67	23.27	165	110	83	62	280	0	1200	400	200	64.8	1.38	2	0	0	0	1	60	100	15	3	4	0	3	3	12	7	16	19	20	14	13	12	10	89.02	74.85	80.52	77.54	77.21	77.86	81.81	84.86	93.16	37	36
25	1	70	168	65	23	160	115	82	72	686	0	1100	100	120	58.8	1.63	2	0	0	0	1	350	97	14	2	4	0	3	3	14	11	18	25	26	20	18	16	14	86.85	82.52	90.51	68.88	75.86	73.2	86.52	79.53	78.56	32	33
26	1	73	157	64	25.96	175	125	101	93	537	0	1000	700	200	72.8	1.38	1	0	0	0	1	70	100	14	4	4	0	1	3	16	10	15	22	22	18	17	16	16	88.51	97.06	100.43	83.83	81.17	68.16	108.05	113.44	94.87	34	39
27	2	73	170	69	23.88	130	95	69	61	687	0	1500	500	350	190	1.75	2	0	1	0	140	60	100	15	3	4	0	2	3	16	12	20	23	24	18	19	17	16	96.76	60.83	84.8	67.17	64.85	64.85	82.53	94.47	91.07	33	38
28	1	67	167	60	21.51	170	120	89	60	915	4	900	100	150	63.7	1.75	1	0	0	0	1	70	100	12	3	5	0	2	5	13	7	16	26	26	18	19	15	14	89.78	74.86	94.81	75.18	62.88	62.82	82.16	80.44	84.47	36	34
29	1	70	170	68	23.53	225	180	135	110	999	4	1500	550	450	100.7	2	2	1	0	0	1	60	100	14	3	3	0	2	2	15	8	12	23	25	20	18	15	16	98.21	84.13	114.07	76.51	78.49	63.2	103.1	77.49	76.82	33	36
30	2	66	162.4	71.5	27.11	150	95	59	48	583	8	1100	600	300	196.9	0.75	2	1	0	0	286	60	99	16	3	3	0	1	3	14	7	15	20	19	14	13	14	13	93.98	71.17	86.49	70.56	69.88	63.86	109.18	94.43	85.09	34	40
31	1	55	174.3	60.3	19.85	150	90	77	70	766	0	1700	1000	150	65.1	1.88	2	0	0	0	1	60	100	17	2	2	0	0	2	16	12	17	18	20	16	16	16	15	88.05	90.51	85.88	76.21	85.53	71.86	89.8	97.53	91.84	34	38
32	1	54	170.6	81.5	28	145	90	67	54	559	0	1450	1200	100	57	1.88	2	0	0	0	1	60	100	14	2	2	0	0	2	13	10	15	22	23	15	15	14	14	107.15	73.2	104.53	87.89	74.54	74.53	112.79	101.49	97.85	34	38
33	1	70	164.9	66	24.27	125	75	57	45	193	4	1400	100	100	44.2	1.38	2	1	1	0	1	60	99	15	3	3	0	0	1	18	13	18	22	20	18	18	16	17	91.81	65.51	99.8	76.5	71.51	63.17	97.12	98.43	103.42	34	40
34	1	73	164	74	27.51	145	95	57	45	533	0	1500	400	80	51.5	1.25	2	0	0	0	1	75	98	17	2	3	0	1	7	18	12	17	25	27	17	19	17	18	101.05	66.5	96.5	75.53	72.89	77.51	89.8	97.11	111.74	37	34
35	1	66	172.3	77.7	26.17	150	105	82	61	608	4	1300	700	200	80.3	2	2	0	1	0	1	60	99	15	3	4	0	1	3	16	11	19	25	28	18	19	16	15	110.96	64.54	84.17	105.14	86.2	68.51	113.81	104.76	112.4	32	39
36	2	56	173.7	69.5	23.03	145	90	48	43	216	0	1300	900	200	197.8	1.25	2	0	0	0	280	60	100	12	3	4	0	0	3	15	8	13	19	19	15	15	14	14	106.11	81.2	109.49	82.87	81.22	88.85	103.1	121.43	112.14	32	42
37	2	59	166	71.5	25.95	160	120	77	52	450	4	1200	500	200	203.8	1.75	2	0	0	0	140	60	100	13	4	4	0	0	2	14	10	15	19	20	16	16	15	15	84.1	73.2	87.86	75.2	67.84	73.2	91.14	81.16	83.16	32	36
38	2	58	168	70	24.8	150	95	59	49	389	0	1200	300	200	65.1	1.75	1	0	0	0	1	75	100	15	4	4	0	1	5	16	11	18	20	23	19	18	16	15	92.53	69.85	95.84	81.19	84.85	73.53	95.16	97.39	98.76	37	43
39	1	54	171	74	25.31	140	85	47	40	275	4	900	50	200	58	1.13	2	1	0	0	1	60	98	17	3	3	0	3	3	14	10	16	20	21	16	19	16	14	112.99	69.85	108.49	78.2	71.86	75.19	95.78	98.47	96.81	33	38
40	1	71	164.3	59.1	21.89	160	110	63	46	999	4	900	400	275	51.6	1.88	2	1	0	0	1	60	97	15	2	3	0	1	3	14	11	17	20	23	14	15	14	15	81.07	81.19	86.5	79.2	79.21	66.5	86.09	107.82	110.46	35	42
41	1	66	170	68	23.53	145	100	73	65	530	4	1500	600	600	62	2.13	2	1	0	0	1	80	99	13	3	3	1	1	2	15	13	16	20	23	17	16	15	16	100.66	91.88	91.88	78.87	69.18	69.19	87.19	96.19	105.17	36	40
42	1	55	166.4	75.3	27.19	150	100	78	67	305	12	900	200	250	200.2	1.75	2	1	0	0	130	60	99	14	4	5	0	0	3	16	10	19	15	16	15	18	16	17	91.72	74.19	78.87	66.21	68.87	68.2	95.13	101.15	98.14	36	36
43	2	65	165	66	24.24	165	120	81	54	950	8	120	300	400	78.8	1.63	2	1	0	0	1	87	98	12	3	3	1	1	3	16	11	17	20	20	14	16	15	16	86.32	66.5	67.18	76.54	67.88	59.18	87.12	62.18	71.13	33	35
44	1	64	174	73	24.11	175	120	81	62	338	4	1400	800	300	209.3	1	1	0	0	0	130	77	99	13	3	4	0	1	3	16	13	18	16	16	16	17	15	16	79.53	65.88	76.84	74.85	73.2	72.87	80.89	74.9	71.53	36	34
45	2	58	168	65	23.03	150	105	72	63	506	4	2000	1000	400	202.4	2	2	0	0	0	130	60	100	19	3	3	0	1	3	16	10	14	20	18	17	12	14	13	90.61	83.51	111.16	97.51	85.19	91.82	109.14	120.11	113.43	37	40
46	2	63	169	65	22.76	165	100	84	72	167	8	1100	400	200	206.4	1.5	1	0	0	0	126	60	99	16	5	5	0	0	2	18	11	14	23	23	19	18	16	17	88.74	67.16	85.79	66.5	80.15	66.83	89.8	93.72	96.37	35	39
47	2	61	167	68	24.38	185	130	105	84	937	8	1500	500	400	262.5	1.88	2	0	0	0	110	60	99	11	4	4	0	0	3	18	8	22	19	20	16	17	15	16	86.8	79.23	79.85	69.85	69.19	69.18	79.09	89.14	90.84	37	38
48	2	68	172	69	23.32	125	100	75	61	188	4	1650	300	200	173.3	1.13	2	1	0	0	110	60	100	14	5	5	0	0	3	15	8	17	21	21	17	18	16	15	90.29	68.49	99.85	73.2	84.8	63.2	90.74	96.41	92.83	35	42
49	2	57	178	70	22.09	155	115	80	65	443	8	1100	200	100	205	1.63	1	0	0	0	140	60	99	15	5	5	0	0	2	15	10	16	17	18	16	15	16	15	93.06	71.19	95.18	73.2	71.55	73.2	85.78	106.76	96.13	35	42
50	1	63	159	54	21.36	145	105	73	61	356	16	1300	300	200	52.8	1.63	2	1	0	0	1	65	99	15	3	4	0	0	2	15	11	16	18	22	18	16	15	14	96.48	63.86	69.52	66.86	68.51	67.84	100.51	103.78	101.45	36	42
51	1	64	166	61	22.14	155	110	72	60	383	12	1300	150	400	63.6	1.63	2	1	0	0	1	60	99	18	3	4	0	3	3	18	10	18	20	22	18	19	18	17	85.9	79.85	76.86	76.53	70.53	65.2	99.8	95.84	94.52	35	33
52	1	73	171	84.2	28.83	150	105	75	65	435	8	1050	600	100	58.7	1.75	2	1	0	0	1	60	97	13	3	4	1	3	3	16	10	16	22	24	16	19	17	16	89.59	81.13	113.74	91.75	85.77	88.1	93.05	102.42	90.12	34	41
53	1	67	163.5	53	19.83	145	100	70	61	611	0	900	100	100	60.5	1.63	2	0	0	0	1	60	99	17	3	4	0	1	2	16	11	18	19	20	13	18	17	16	88.05	64.13	78.18	70.85	68.51	68.18	97.79	100.09	96.77	33	33
54	2	68	172	66	22.31	165	120	78	62	527	0	1400	300	500	205.4	1.63	1	0	0	0	136	70	99	16	4	4	1	0	3	14	6	20	20	20	18	16	15	14	99.73	83.2	89.5	69.53	68.53	69.19	93.1	96.44	92.77	36	42
55	2	55	174	65	21.47	135	100	68	60	394	0	1650	400	150	173.3	1.38	1	0	0	0	260	60	99	16	5	5	0	1	2	14	10	14	22	26	18	18	17	15	85.03	68.56	94.54	78.86	79.53	79.19	97.16	102.57	106.58	35	38
56	2	62	173.3	71.8	23.91	150	110	76	62	358	16	1400	500	200	226.8	1.38	2	1	0	0	140	60	99	18	5	5	0	0	2	15	8	17	18	18	11	15	14	15	82.21	83.84	75.21	67.84	70.15	66.5	109.8	76.81	71.81	37	33
57	1	59	172	71	24	205	165	113	88	967	12	1600	350	100	92.8	1.88	2	1	0	0	1	90	98	15	2	3	0	2	3	16	11	19	18	19	17	18	16	15	105.76	66.5	81.8	70.84	71.5	59.49	104.49	108.1	105.12	37	35
58	1	64	172.3	88.9	29.95	155	115	80	71	885	4	1900	1500	150	80	1.88	2	0	0	0	1	60	98	12	2	3	0	1	1	17	12	20	25	26	15	19	17	16	93.59	69.85	103.1	92.48	87.16	80.17	104.8	87.47	86.49	37	42
59	1	56	170	68	23.61	170	130	77	67	730	0	1200	200	100	67.2	1.38	1	0	0	0	1	60	99	17	2	3	0	1	3	16	10	18	24	24	16	17	15	16	91.7	81.19	107.18	100.5	84.85	77.17	102.79	101.13	97.8	39	38
60	1	67	173	74	24.73	135	95	78	71	446	4	1000	300	150	61	2	2	1	0	0	1	60	99	13	3	4	0	1	2	14	6	12	17	20	12	17	15	14	86.06	61.85	78.51	70.51	63.86	63.51	104.49	85.79	82.78	35	38
61	2	66	170.6	73.7	25.32	135	110	73	65	345	0	1600	150	200	192.1	1.13	2	0	0	0	132	60	99	13	4	4	0	1	2	14	6	15	20	20	15	16	13	14	93.98	71.49	105.82	71.18	68.2	63.51	103.1	91.47	92.12	32	37
62	2	55	166.4	68.1	24.59	125	95	65	60	460	0	1200	500	250	174	1.13	2	1	0	0	120	60	100	13	4	4	0	1	3	16	10	16	17	17	15	16	15	15	104.7	85.84	112.51	93.85	87.88	71.89	105.82	90.48	89.48	36	40
63	1	68	167	67	24.02	160	115	85	70	420	32	1600	800	100	67.5	1.88	1	0	0	0	1	78	98	15	2	3	0	2	2	14	10	20	23	24	19	19	17	16	93.75	67.22	93.2	80.86	78.53	76.54	64.52	76.55	76.19	35	41
64	2	47	173	61	20.38	145	100	66	60	249	8	1200	500	500	206.8	1.25	1	0	0	0	120	60	100	16	4	4	0	0	2	14	7	14	16	17	12	14	13	13	78.28	58.51	81.21	78.91	67.55	70.56	86.45	67.83	66.5	32	38
65	2	62	168	75	26.57	175	125	81	68	428	4	1100	400	300	206.7	1.13	2	1	0	1	150	60	100	14	4	4	0	0	2	17	12	15	20	20	17	19	18	18	97.56	96.8	86.48	64.53	64.85	76.45	92.06	108.43	101.74	37	39
66	2	56	162.2	62.1	23.6	135	100	70	60	336	12	1200	200	200	165.9	1.38	2	1	1	0	120	60	99	17	2	3	0	1	3	15	7	15	18	19	14	15	14	14	98.88	65.87	69.19	73.2	69.19	69.85	73.82	84.43	84.13	38	39
[truncated: 12 more columns]
